# Supplementary material for: Distinct Characteristics and Clinical Outcomes to Predict the Emergence of MET Amplification in Patients with Non-Small Cell Lung Cancer Who Developed Resistance after Treatment with Epidermal Growth Factor Receptor Tyrosine Kinase Inhibitors
Source: MDPI journal article supplement (doi:10.3390/cancers13123096), 2021-06-21
Supplement: s1 [file s1]

**Table S1. Patient characteristics based on MET status (first/second generation cohort, N = 124)**

|                                                          | <b>MET –</b><br>(N = 109) | <b>MET +</b><br>(N = 15) |                |
|----------------------------------------------------------|---------------------------|--------------------------|----------------|
|                                                          | N (%)                     | N (%)                    | <i>P</i> value |
| <b>Median age, years (range)</b>                         | 60 (28–84)                | 62 (43–73)               | 0.549          |
| <b>Sex</b>                                               |                           |                          |                |
| Male                                                     | 41 (37.6%)                | 5 (33.3%)                |                |
| Female                                                   | 68 (62.4%)                | 10 (66.7%)               | 0.748          |
| <b>Smoking status</b>                                    |                           |                          |                |
| Current smoker                                           | 5 (4.6%)                  | 0 (0.0%)                 |                |
| Ex-smoker                                                | 29 (26.6%)                | 6 (40.0%)                |                |
| Never smoker                                             | 75 (68.8%)                | 9 (60.0%)                |                |
| <b>Median pack-year of smoking (interquartile range)</b> | 0.0 (0.0 – 15.0)          | 0.0 (0.0 – 18.0)         | 0.663          |
| <b>Previous TKI line</b>                                 |                           |                          |                |
| First line                                               | 93 (85.3%)                | 11 (73.2%)               |                |
| Second line                                              | 15 (13.8%)                | 3 (20.0%)                |                |
| Third line                                               | 1 (0.9%)                  | 1 (6.7%)                 | 0.194          |
| <b>Founder <i>EGFR</i> mutation</b>                      |                           |                          |                |
| Exon 19 deletion                                         | 60 (55.0%)                | 9 (60.0%)                |                |
| L858R                                                    | 40 (36.7%)                | 5 (33.3%)                |                |
| Other mutations**                                        | 9 (8.3%)                  | 1 (6.7%)                 | 0.932          |
| <b>Liver metastasis</b>                                  |                           |                          |                |
| No metastases                                            | 93 (85.3%)                | 7 (46.7%)                |                |
| Baseline metastases without progression                  | 0 (0.0%)                  | 3 (20.0%)                |                |
| Baseline metastases with progression                     | 3 (2.8%)                  | 4 (26.7%)                |                |
| Progression with new lesion                              | 13 (11.9%)                | 1 (6.7%)                 | 0.071*         |
| <b>Brain metastasis</b>                                  |                           |                          |                |
| No metastases                                            | 29 (26.6%)                | 8 (53.3%)                |                |
| Baseline metastases without progression                  | 5 (4.6%)                  | 4 (26.7%)                |                |
| Baseline metastases with progression                     | 47 (43.1%)                | 2 (13.3%)                |                |
| Progression with new lesion                              | 24 (22.0%)                | 1 (6.7%)                 | < 0.001*       |
| Not evaluated                                            | 4 (3.7%)                  | 0 (0.0%)                 |                |

MET, mesenchymal epithelial transition factor; TKI, tyrosine kinase inhibitor; EGFR, epidermal growth factor receptor; SD, standard deviation.

\*Between progression versus no progression

\*\*Other mutations include exon 20 insertion (p.A767\_V769dup) (N = 1), G719X (N = 2), L861Q (N = 4), and S768I (N = 2) in MET (-) group and G179S/L861Q (N = 1) in MET (+) group.

**Table S2. Patient characteristics based on MET status  
(third generation cohort, N = 62)**

|                                                              | <b>MET –<br/>(N = 47)</b> | <b>MET +<br/>(N = 15)</b> |                |
|--------------------------------------------------------------|---------------------------|---------------------------|----------------|
|                                                              | <b>N (%)</b>              | <b>N (%)</b>              | <b>P value</b> |
| <b>Median age, years (range)</b>                             | 61 (40–81)                | 55 (28–76)                | 0.067          |
| <b>Sex</b>                                                   |                           |                           |                |
| Male                                                         | 16 (34.0%)                | 8 (53.3%)                 | 0.182          |
| Female                                                       | 31 (66.0%)                | 7 (46.7%)                 |                |
| <b>Smoking</b>                                               |                           |                           |                |
| Current smoker                                               | 3 (6.4%)                  | 1 (6.7%)                  | 0.205          |
| Ex-smoker                                                    | 8 (17.0%)                 | 9 (60.0%)                 |                |
| Never smoker                                                 | 36 (76.6%)                | 5 (33.3%)                 |                |
| <b>Median pack-year of smoking<br/>(interquartile range)</b> | 0.0 (0.0 – 0.0)           | 4.0 (0.0 – 33.0)          | 0.205          |
| <b>Previous TKI line</b>                                     |                           |                           |                |
| First line                                                   | 0 (0.0%)                  | 0 (0.0%)                  | 0.068          |
| Second line                                                  | 43 (91.5%)                | 11 (73.3%)                |                |
| Third line                                                   | 4 (8.5%)                  | 4 (26.7%)                 |                |
| <b>Founder <i>EGFR</i> mutation</b>                          |                           |                           |                |
| Exon 19 deletion                                             | 28 (59.6%)                | 10 (66.0%)                | 0.623          |
| L858R                                                        | 19 (40.4%)                | 5 (33.3%)                 |                |
| Other mutations                                              | 0 (0.0%)                  | 0 (0.0%)                  |                |
| <b>Liver metastasis</b>                                      |                           |                           |                |
| No metastases                                                | 32 (68.1%)                | 11 (73.3%)                | 0.817*         |
| Baseline metastases without progression                      | 1 (2.1%)                  | 0 (0.0%)                  |                |
| Baseline metastases with progression                         | 1 (2.1%)                  | 3 (20%)                   |                |
| Progression with new lesion                                  | 13 (27.7%)                | 1 (6.7%)                  |                |
| <b>Brain metastasis</b>                                      |                           |                           |                |
| No metastases                                                | 15 (31.9%)                | 8 (53.3%)                 | 0.029*         |
| Baseline metastases without progression                      | 2 (4.3%)                  | 3 (20.0%)                 |                |
| Baseline metastases with progression                         | 12 (25.5%)                | 3 (20.0%)                 |                |
| Progression with new lesion                                  | 13 (27.7%)                | 1 (6.7%)                  |                |
| Not evaluated                                                | 5 (10.6%)                 | 0 (0.0%)                  |                |

MET, mesenchymal epithelial transition factor; TKI, tyrosine kinase inhibitor; EGFR, epidermal growth factor receptor; SD, standard deviation.

\*Between progression versus no progression
